# Supplementary material for: Trends in Antidepressants Use in Spain between 2015 and 2018: Analyses from a Population-Based Registry Study with Reference to Driving
Source: PubMed Central journal article supplement (PMC7243100; doi:10.3390/ph13040061), 2020-04-03
Supplement: pharmaceuticals-13-00061-s001.pdf [file pharmaceuticals-13-00061-s001.pdf]

**Table S1:** Antidepressants available in Castile and León (2015 – 2018).

| Type of antidepressant                      | Code ATC     | Name           | DRUID categorization |
|---------------------------------------------|--------------|----------------|----------------------|
| Non-selective monoamine reuptake inhibitors | N06AA02      | Imipramine     | II                   |
|                                             | N06AA04      | Clomipramine   | II                   |
|                                             | N06AA06      | Trimipramine   | II                   |
|                                             | N06AA09      | Amitriptyline  | III                  |
|                                             | N06AA10      | Nortriptyline  | II                   |
|                                             | N06AA12      | Doxepine       | III                  |
|                                             | N06AA21      | Maprotiline    | II                   |
| Selective serotonin reuptake inhibitors     | N06AB03      | Fluoxetine     | I                    |
|                                             | N06AB04      | Citalopram     | I                    |
|                                             | N06AB05      | Paroxetine     | I                    |
|                                             | N06AB06      | Sertraline     | I                    |
|                                             | N06AB08      | Fluvoxamine    | I                    |
|                                             | N06AB10      | Escitalopram   | I                    |
| Monoamine oxidase A inhibitors              | N06AG02      | Moclobemide    | I                    |
| Other antidepressants                       | N06AX03      | Mianserin      | III                  |
|                                             | N06AX05      | Trazodone      | III                  |
|                                             | N06AX11      | Mirtazapine    | III                  |
|                                             | N06AX12      | Bupropion      | II                   |
|                                             | N06AX14      | Tianeptine     | II                   |
|                                             | N06AX16      | Venlafaxine    | II                   |
|                                             | N06AX18      | Reboxetine     | I                    |
|                                             | N06AX01      | Duloxetine     | II                   |
|                                             | N06AX02      | Agomelatine    | II                   |
|                                             | N06AX03      | Desvenlafaxine | II                   |
| N06AX06                                     | Vortioxetine | II             |                      |

**Table S2:** Evolution of the Castile and León population and drivers's licences (2015 – 2018).

| Rank age     | Population       |                  |                  |                  |                  |                  |                  |                  |                  |                  |                  |                  |
|--------------|------------------|------------------|------------------|------------------|------------------|------------------|------------------|------------------|------------------|------------------|------------------|------------------|
|              | 2015             |                  |                  | 2016             |                  |                  | 2017             |                  |                  | 2018             |                  |                  |
|              | Male             | Female           | Total            | Male             | Female           | Total            | Male             | Female           | Total            | Male             | Female           | Total            |
| 0-4          | 45 405           | 42 504           | 87 909           | 44 382           | 41 386           | 85 768           | 42 905           | 40 144           | 83 049           | 41 604           | 39 121           | 80 725           |
| 5-9          | 50 925           | 48 078           | 99 003           | 50 665           | 47 821           | 98 486           | 50 035           | 47 344           | 97 379           | 48 594           | 45 657           | 94 251           |
| 10-14        | 49 439           | 47 220           | 96 659           | 49 847           | 47 730           | 97 577           | 50 316           | 48 259           | 98 575           | 51 124           | 48 407           | 99 531           |
| 15-19        | 48 620           | 46 904           | 95 524           | 48 862           | 46 935           | 95 797           | 48 939           | 46 706           | 95 645           | 49 610           | 47 885           | 97 495           |
| 20-24        | 54 724           | 53 382           | 108 106          | 53 230           | 52 333           | 105 563          | 52 182           | 51 246           | 103 428          | 51 428           | 50 777           | 102 205          |
| 25-29        | 62 787           | 61 247           | 124 034          | 61 109           | 59 382           | 120 491          | 59 522           | 57 531           | 117 053          | 58 298           | 56 506           | 114 804          |
| 30-34        | 75 089           | 71 664           | 146 753          | 71 742           | 68 841           | 140 583          | 68 575           | 66 051           | 134 626          | 65 942           | 63 241           | 129 183          |
| 35-39        | 90 372           | 87 031           | 177 403          | 87 267           | 83 676           | 170 943          | 83 600           | 80 400           | 164 000          | 79 663           | 76 944           | 156 607          |
| 40-44        | 92 686           | 89 879           | 182 565          | 92 967           | 90 094           | 183 061          | 92 799           | 89 681           | 182 480          | 92 434           | 89 499           | 181 933          |
| 45-49        | 93 082           | 91 643           | 184 725          | 93 035           | 91 392           | 184 427          | 92 076           | 90 588           | 182 664          | 91 744           | 89 952           | 181 696          |
| 50-54        | 93 252           | 90 618           | 183 870          | 93 251           | 91 395           | 184 646          | 93 500           | 91 893           | 185 393          | 92 913           | 92 426           | 185 339          |
| 55-59        | 87 280           | 84 212           | 171 492          | 88 988           | 85 894           | 174 882          | 89 831           | 86 956           | 176 787          | 90 852           | 87 988           | 178 840          |
| 60-64        | 72 448           | 69 337           | 141 785          | 75 073           | 72 029           | 147 102          | 77 520           | 74 875           | 152 395          | 79 640           | 77 583           | 157 223          |
| 65-69        | 65 430           | 66 777           | 132 207          | 66 403           | 67 268           | 133 671          | 67 615           | 68 053           | 135 668          | 67 660           | 67 825           | 135 485          |
| 70-74        | 56 526           | 61 968           | 118 494          | 58 076           | 63 396           | 121 472          | 58 913           | 64 067           | 122 980          | 60 320           | 64 908           | 125 228          |
| 75-79        | 45 154           | 56 939           | 102 093          | 43 540           | 53 807           | 97 347           | 43 510           | 52 990           | 96 500           | 46 205           | 55 251           | 101 456          |
| 80-84        | 44 543           | 62 354           | 106 897          | 44 319           | 62 772           | 107 091          | 42 312           | 60 175           | 102 487          | 39 465           | 56 065           | 95 530           |
| 85-89        | 27 547           | 46 335           | 73 882           | 28 618           | 47 555           | 76 173           | 29 407           | 48 337           | 77 744           | 29 731           | 48 690           | 78 421           |
| ≥ 90         | 13 282           | 30 034           | 43 316           | 14 119           | 31 809           | 45 928           | 14 662           | 32 970           | 47 632           | 15 333           | 34 407           | 49 740           |
| <b>Total</b> | <b>1 168 591</b> | <b>1 208 126</b> | <b>2 376 717</b> | <b>1 165 493</b> | <b>1 205 515</b> | <b>2 371 008</b> | <b>1 158 219</b> | <b>1 198 266</b> | <b>2 356 485</b> | <b>1 152 560</b> | <b>1 193 132</b> | <b>2 345 692</b> |

| Rank age     | Driver's licence census |                |                  |                |                |                  |                |                |                  |                |                |                  |
|--------------|-------------------------|----------------|------------------|----------------|----------------|------------------|----------------|----------------|------------------|----------------|----------------|------------------|
|              | 2015                    |                |                  | 2016           |                |                  | 2017           |                |                  | 2018           |                |                  |
|              | Male                    | Female         | Total            | Male           | Female         | Total            | Male           | Female         | Total            | Male           | Female         | Total            |
| 15-19        | 9 282                   | 5 586          | 14 868           | 9 238          | 5 634          | 14 872           | 8 357          | 4 689          | 13 046           | 8 702          | 5 102          | 13 804           |
| 20-24        | 43 294                  | 35 387         | 78 681           | 42 165         | 34 280         | 76 445           | 40 859         | 33 207         | 74 066           | 39 837         | 32 570         | 72 407           |
| 25-29        | 55 831                  | 50 618         | 106 449          | 53 617         | 48 755         | 102 372          | 51 913         | 46 861         | 98 774           | 50 269         | 45 329         | 95 598           |
| 30-34        | 69 810                  | 61 387         | 131 197          | 66 192         | 58 489         | 124 681          | 62 677         | 56 134         | 118 811          | 59 765         | 53 560         | 113 325          |
| 35-39        | 86 841                  | 75 838         | 162 679          | 83 112         | 72 880         | 155 992          | 79 204         | 70 129         | 149 333          | 74 693         | 66 771         | 141 464          |
| 40-44        | 89 294                  | 76 277         | 165 571          | 88 673         | 76 856         | 165 529          | 88 025         | 76 717         | 164 742          | 87 163         | 76 513         | 163 676          |
| 45-49        | 90 151                  | 74 310         | 164 461          | 89 641         | 74 389         | 164 030          | 88 611         | 74 242         | 162 853          | 87 961         | 74 534         | 162 495          |
| 50-54        | 90 450                  | 67 282         | 157 732          | 90 290         | 69 036         | 159 326          | 90 158         | 70 695         | 160 853          | 89 420         | 72 062         | 161 482          |
| 55-59        | 85 820                  | 56 346         | 142 166          | 87 607         | 59 781         | 147 388          | 88 543         | 62 443         | 150 986          | 89 826         | 64 796         | 154 622          |
| 60-64        | 71 450                  | 36 255         | 107 705          | 74 219         | 40 173         | 114 392          | 76 748         | 44 338         | 121 086          | 79 194         | 48 281         | 127 475          |
| 65-69        | 62 572                  | 23 964         | 86 536           | 63 824         | 26 068         | 89 892           | 65 577         | 28 466         | 94 043           | 65 978         | 30 748         | 96 726           |
| 70-74        | 51 161                  | 12 390         | 63 551           | 52 595         | 13 755         | 66 350           | 53 663         | 15 096         | 68 759           | 55 094         | 16 442         | 71 536           |
| 75-79        | 35 993                  | 5 000          | 40 993           | 34 852         | 5 277          | 40 129           | 35 960         | 6 008          | 41 968           | 38 829         | 7 105          | 45 934           |
| 80-84        | 28 304                  | 1 941          | 30 245           | 28 194         | 2 055          | 30 249           | 27 809         | 2 319          | 30 128           | 26 500         | 2 491          | 28 991           |
| 85-89        | 14 160                  | 429            | 14 589           | 14 133         | 484            | 14 617           | 14 548         | 588            | 15 136           | 14 814         | 661            | 15 475           |
| ≥ 90         | 2 944                   | 22             | 2 966            | 5 669          | 50             | 5 719            | 6 176          | 77             | 6 253            | 7 350          | 112            | 7 462            |
| <b>Total</b> | <b>887 357</b>          | <b>583 032</b> | <b>1 470 389</b> | <b>884 021</b> | <b>587 962</b> | <b>1 471 983</b> | <b>878 828</b> | <b>592 009</b> | <b>1 470 837</b> | <b>875 395</b> | <b>597 077</b> | <b>1 472 472</b> |

**Table S3:** List of the 40 DIMs more consumed in Castile and León into the study period (Packages/year).

| Code ATC | Name                       | Packages  | Code ATC | Name                                 | Packages |
|----------|----------------------------|-----------|----------|--------------------------------------|----------|
| N02BB02  | Metamizole sodium          | 1 189 861 | N05BA05  | Potassium clorazepate                | 160 627  |
| N05BA06  | Lorazepam                  | 989 565   | N05AH04  | Quetiapine                           | 158 143  |
| N05BA12  | Alprazolam                 | 861 791   | N06AA09  | Amitriptyline                        | 152 437  |
| N02AJ13  | Tramadol and paracetamol   | 683 935   | N03AX14  | Levetiracetam                        | 130 749  |
| N05CD06  | Lormetazepam               | 582 253   | N06AX05  | Trazodone                            | 130 569  |
| N05BA08  | Bromazepam                 | 391 733   | N02AX02  | Tramadol                             | 129 998  |
| N03AX16  | Pregabalin                 | 277 073   | N05AH03  | Olanzapine                           | 100 752  |
| N06AB10  | Escitalopam                | 274 420   | N03AE01  | Clonazepam                           | 100 692  |
| N02AJ06  | Codeine and Paracetamol    | 273 087   | N06AB04  | Citalopram                           | 96 353   |
| N05BA01  | DIAZEPAM                   | 269 764   | N06AX23  | Desvenlafaxine                       | 92 661   |
| N05CF02  | ZOLPIDEM                   | 254 270   | N06AB03  | Fluoxetine                           | 87 875   |
| N06AB06  | Setraline                  | 244 838   | N03AG01  | Valproic acid                        | 86 492   |
| N06AX11  | Mirtazapine                | 240 745   | N04BA02  | Levodopa and decarboxylase inhibitor | 86 430   |
| N06AX16  | Venlafaxine                | 229 529   | N05AL01  | Sulpiride                            | 84 765   |
| A10BD07  | Metformin and sitagliptin  | 212 812   | A10BH01  | Sitagliptine                         | 83 896   |
| N06AX21  | Duloxetine                 | 189 961   | N03AX12  | Gabapentine                          | 83 492   |
| N06AB05  | Paroxetine                 | 189 552   | A10BB09  | Gliclazide                           | 82 833   |
| A10AE04  | Insuline glargin           | 185 578   | A10BX02  | Repaglinide                          | 80 218   |
| N02AB03  | Fentanyl                   | 182 729   | N05AX08  | Risperidone                          | 79 294   |
| A10BD08  | Metformin and vildagliptin | 179 957   | A10BH05  | Linagliptine                         | 78 734   |

**Table S4.** Evolution of antidepressants use in Castile and León (2015 – 2018)

|                                             | Population % (95CI)              |                                   |                                   |                                  | Drivers % (95CI)                  |                                   |                                   |                                   |
|---------------------------------------------|----------------------------------|-----------------------------------|-----------------------------------|----------------------------------|-----------------------------------|-----------------------------------|-----------------------------------|-----------------------------------|
|                                             | 2015                             | 2016                              | 2017                              | 2018                             | 2015                              | 2016                              | 2017                              | 2018                              |
| <b>Antidepressants</b>                      |                                  |                                   |                                   |                                  |                                   |                                   |                                   |                                   |
| Non-selective monoamine reuptake inhibitors |                                  |                                   |                                   |                                  |                                   |                                   |                                   |                                   |
| Total                                       | 1.01 (1 - 1.02)                  | 1.09 (1.08 - 1.1)                 | 1.12 (1.11 - 1.13)                | 1.23 (1.22 - 1.24)               | 0.68 (0.67 - 0.69)                | 0.79 (0.78 - 0.8)                 | 0.83 (0.82 - 0.84)                | 0.92 (0.9 - 0.94)                 |
| Male                                        | 0.51 (0.5 - 0.52)                | 0.57 (0.56 - 0.58)                | 0.58 (0.57 - 0.59)                | 0.65 (0.64 - 0.66)               | 0.53 (0.51 - 0.55)                | 0.59 (0.57 - 0.61)                | 0.61 (0.59 - 0.63)                | 0.69 (0.67 - 0.71)                |
| Female                                      | 1.49 (1.47 - 1.51)               | 1.6 (1.58 - 1.62)                 | 1.65 (1.63 - 1.67)                | 1.79 (1.77 - 1.81)               | 0.91 (0.89 - 0.93)                | 1.09 (1.06 - 1.12)                | 1.15 (1.12 - 1.18)                | 1.26 (1.23 - 1.29)                |
|                                             | X <sup>2</sup> =50.326; p=0.001  | X <sup>2</sup> =48.125; p=0.001   | X <sup>2</sup> =39.478; p=0.001   | X <sup>2</sup> =52.147; p=0.001  | X <sup>2</sup> =1746.258; p=0.001 | X <sup>2</sup> =1896.324; p=0.001 | X <sup>2</sup> =1986.214; p=0.001 | X <sup>2</sup> =1896.247; p=0.001 |
| Selective serotonin reuptake inhibitors     |                                  |                                   |                                   |                                  |                                   |                                   |                                   |                                   |
| Total                                       | 4.61 (4.58 - 4.64)               | 5.15 (5.12 - 5.18)                | 4.96 (4.93 - 4.99)                | 5.24 (5.21 - 5.27)               | 2.98 (2.95 - 3.01)                | 3.44 (3.41 - 3.47)                | 3.33 (3.3 - 3.36)                 | 3.53 (3.5 - 3.56)                 |
| Male                                        | 2.43 (2.4 - 2.46)                | 2.79 (2.76 - 2.82)                | 2.66 (2.63 - 2.69)                | 2.86 (2.83 - 2.89)               | 2.45 (2.42 - 2.48)                | 2.77 (2.74 - 2.8)                 | 2.67 (2.64 - 2.7)                 | 2.86 (2.83 - 2.89)                |
| Female                                      | 6.73 (6.69 - 6.77)               | 7.43 (7.38 - 7.48)                | 7.18 (7.13 - 7.23)                | 7.53 (7.48 - 7.58)               | 3.78 (3.73 - 3.83)                | 4.45 (4.4 - 4.5)                  | 4.31 (4.26 - 4.36)                | 4.52 (4.47 - 4.57)                |
|                                             | X <sup>2</sup> =985.254; p=0.001 | X <sup>2</sup> =1058.981; p=0.001 | X <sup>2</sup> =1125.698; p=0.001 | X <sup>2</sup> =974.251; p=0.001 | X <sup>2</sup> =6587.149; p=0.001 | X <sup>2</sup> =6418.187; p=0.001 | X <sup>2</sup> =6725.792; p=0.001 | X <sup>2</sup> =6658.217; p=0.001 |
| Other antidepressants                       |                                  |                                   |                                   |                                  |                                   |                                   |                                   |                                   |
| Total                                       | 3.14 (3.12 - 3.16)               | 3.81 (3.79 - 3.83)                | 3.73 (3.71 - 3.75)                | 4.17 (4.14 - 4.2)                | 1.96 (1.94 - 1.98)                | 2.43 (2.41 - 2.45)                | 2.4 (2.38 - 2.42)                 | 2.66 (2.63 - 2.69)                |
| Male                                        | 1.9 (1.88 - 1.92)                | 2.39 (2.36 - 2.42)                | 2.31 (2.28 - 2.34)                | 2.65 (2.62 - 2.68)               | 1.89 (1.86 - 1.92)                | 2.29 (2.26 - 2.32)                | 2.26 (2.23 - 2.29)                | 2.53 (2.5 - 2.56)                 |
| Female                                      | 4.34 (4.3 - 4.38)                | 5.18 (5.14 - 5.22)                | 5.11 (5.07 - 5.15)                | 5.65 (5.61 - 5.69)               | 2.08 (2.04 - 2.12)                | 2.63 (2.59 - 2.67)                | 2.61 (2.57 - 2.65)                | 2.83 (2.79 - 2.87)                |
|                                             | X <sup>2</sup> =678.241; p=0.001 | X <sup>2</sup> =698.875; p=0.001  | X <sup>2</sup> =685.458; p=0.001  | X <sup>2</sup> =648.578; p=0.001 | X <sup>2</sup> =5420.369; p=0.001 | X <sup>2</sup> =5698.439; p=0.001 | X <sup>2</sup> =5324.946; p=0.001 | X <sup>2</sup> =5987.781; p=0.001 |

Abbreviations: 95CI. confidence interval

**Table S5.** Evolution of antidepressants use in Castile and León by DRUID classification (2015 – 2018)

|                             | Population % (95CI)              |                                  |                                  |                                  | Drivers % (95CI)                  |                                   |                                   |                                   |
|-----------------------------|----------------------------------|----------------------------------|----------------------------------|----------------------------------|-----------------------------------|-----------------------------------|-----------------------------------|-----------------------------------|
|                             | 2015                             | 2016                             | 2017                             | 2018                             | 2015                              | 2016                              | 2017                              | 2018                              |
| <b>DRUID clasiffication</b> |                                  |                                  |                                  |                                  |                                   |                                   |                                   |                                   |
| <b>1</b>                    |                                  |                                  |                                  |                                  |                                   |                                   |                                   |                                   |
| Total                       | 4.63 (4.6 - 4.66)                | 5.17 (5.14 - 5.2)                | 4.98 (4.95 - 5.01)               | 5.26 (5.23 - 5.29)               | 2.99 (2.96 - 3.02)                | 3.46 (3.43 - 3.49)                | 3.34 (3.31 - 3.37)                | 3.54 (3.51 - 3.57)                |
| Male                        | 2.44 (2.41 - 2.47)               | 2.8 (2.77 - 2.83)                | 2.67 (2.64 - 2.7)                | 2.87 (2.84 - 2.9)                | 2.46 (2.43 - 2.49)                | 2.79 (2.76 - 2.82)                | 2.68 (2.65 - 2.71)                | 2.87 (2.84 - 2.9)                 |
| Female                      | 6.76 (6.72 - 6.8)                | 7.46 (7.41 - 7.51)               | 7.21 (7.16 - 7.26)               | 7.56 (7.51 - 7.61)               | 3.79 (3.74 - 3.84)                | 4.47 (4.42 - 4.52)                | 4.32 (4.27 - 4.37)                | 4.53 (4.48 - 4.58)                |
|                             | X <sup>2</sup> =895.214; p=0.001 | X <sup>2</sup> =986.325; p=0.001 | X <sup>2</sup> =854.214; p=0.001 | X <sup>2</sup> =995.687; p=0.001 | X <sup>2</sup> =6358.214; p=0.001 | X <sup>2</sup> =5987.147; p=0.001 | X <sup>2</sup> =6398.257; p=0.001 | X <sup>2</sup> =5987.214; p=0.001 |
| <b>2</b>                    |                                  |                                  |                                  |                                  |                                   |                                   |                                   |                                   |
| Total                       | 2.06 (2.04 - 2.08)               | 2.28 (2.26 - 2.3)                | 2.26 (2.24 - 2.28)               | 2.44 (2.42 - 2.46)               | 1.37 (1.35 - 1.39)                | 1.62 (1.6 - 1.64)                 | 1.63 (1.61 - 1.65)                | 1.75 (1.73 - 1.77)                |
| Male                        | 1.15 (1.13 - 1.17)               | 1.3 (1.28 - 1.32)                | 1.3 (1.28 - 1.32)                | 1.41 (1.39 - 1.43)               | 1.23 (1.21 - 1.25)                | 1.38 (1.36 - 1.4)                 | 1.4 (1.38 - 1.42)                 | 1.5 (1.47 - 1.53)                 |
| Female                      | 2.93 (2.9 - 2.96)                | 3.22 (3.19 - 3.25)               | 3.19 (3.16 - 3.22)               | 3.44 (3.41 - 3.47)               | 1.6 (1.57 - 1.63)                 | 1.98 (1.94 - 2.02)                | 1.97 (1.93 - 2.01)                | 2.12 (2.08 - 2.16)                |
|                             | X <sup>2</sup> =70.289; p=0.001  | X <sup>2</sup> =65.365; p=0.001  | X <sup>2</sup> =69.587; p=0.001  | X <sup>2</sup> =67.354; p=0.001  | X <sup>2</sup> =1658.247; p=0.001 | X <sup>2</sup> =1587.965; p=0.001 | X <sup>2</sup> =1625.387; p=0.001 | X <sup>2</sup> =1710.256; p=0.001 |
| <b>3</b>                    |                                  |                                  |                                  |                                  |                                   |                                   |                                   |                                   |
| Total                       | 2.42 (2.4 - 2.44)                | 3.03 (3.01 - 3.05)               | 3 (2.98 - 3.02)                  | 3.41 (3.39 - 3.43)               | 1.48 (1.46 - 1.5)                 | 1.87 (1.85 - 1.89)                | 1.87 (1.85 - 1.89)                | 2.11 (2.09 - 2.13)                |
| Male                        | 1.46 (1.44 - 1.48)               | 1.9 (1.88 - 1.92)                | 1.83 (1.81 - 1.85)               | 2.16 (2.13 - 2.19)               | 1.4 (1.38 - 1.42)                 | 1.76 (1.73 - 1.79)                | 1.73 (1.7 - 1.76)                 | 1.99 (1.96 - 2.02)                |
| Female                      | 3.36 (3.33 - 3.39)               | 4.11 (4.07 - 4.15)               | 4.13 (4.09 - 4.17)               | 4.62 (4.58 - 4.66)               | 1.59 (1.56 - 1.62)                | 2.04 (2 - 2.08)                   | 2.08 (2.04 - 2.12)                | 2.29 (2.25 - 2.33)                |
|                             | X <sup>2</sup> =587.145; p=0.001 | X <sup>2</sup> =699.247; p=0.001 | X <sup>2</sup> =654.228; p=0.001 | X <sup>2</sup> =630.259; p=0.001 | X <sup>2</sup> =4458.698; p=0.001 | X <sup>2</sup> =4698.357; p=0.001 | X <sup>2</sup> =4968.587; p=0.001 | X <sup>2</sup> =4789.653; p=0.001 |

Abbreviations: 95CI. confidence interval
